# Supplementary material for: Automatic delineation of geomorphological slope units with r.slopeunits v1.0 and their optimization for landslide susceptibility modeling
Source: Copernicus journal article supplement (doi:10.5194/gmd-9-3975-2016), 2016-11-09
Supplement: Supplementary file 1 [file gmd-9-3975-2016-supplement.zip]

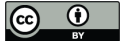

## *Supplement of*

# **Automatic delineation of geomorphological slope units with `r.slopeunits` v1.0 and their optimization for landslide susceptibility modeling**

**Massimiliano Alvioli et al.**

*Correspondence to:* Massimiliano Alvioli ([massimiliano.alvioli@irpi.cnr.it](mailto:massimiliano.alvioli@irpi.cnr.it))

- `gmd-9-3975-2016-supplement-title-page.pdf`
- `slu`
  - `clean_method_3.sh`
  - `r.slopeunits`

The copyright of individual parts of the supplement might differ from the CC-BY 3.0 licence.
